# Supplementary figures and images for: Synthesis, crystal structure and catalytic property of a new samarium compound derived from 5-(pyrazin-2-yl)tetrazole-2-acetic acid
Source: Royal Society of Chemistry journal article supplement (doi:10.1039/c5ra03296b), 2015-01-01

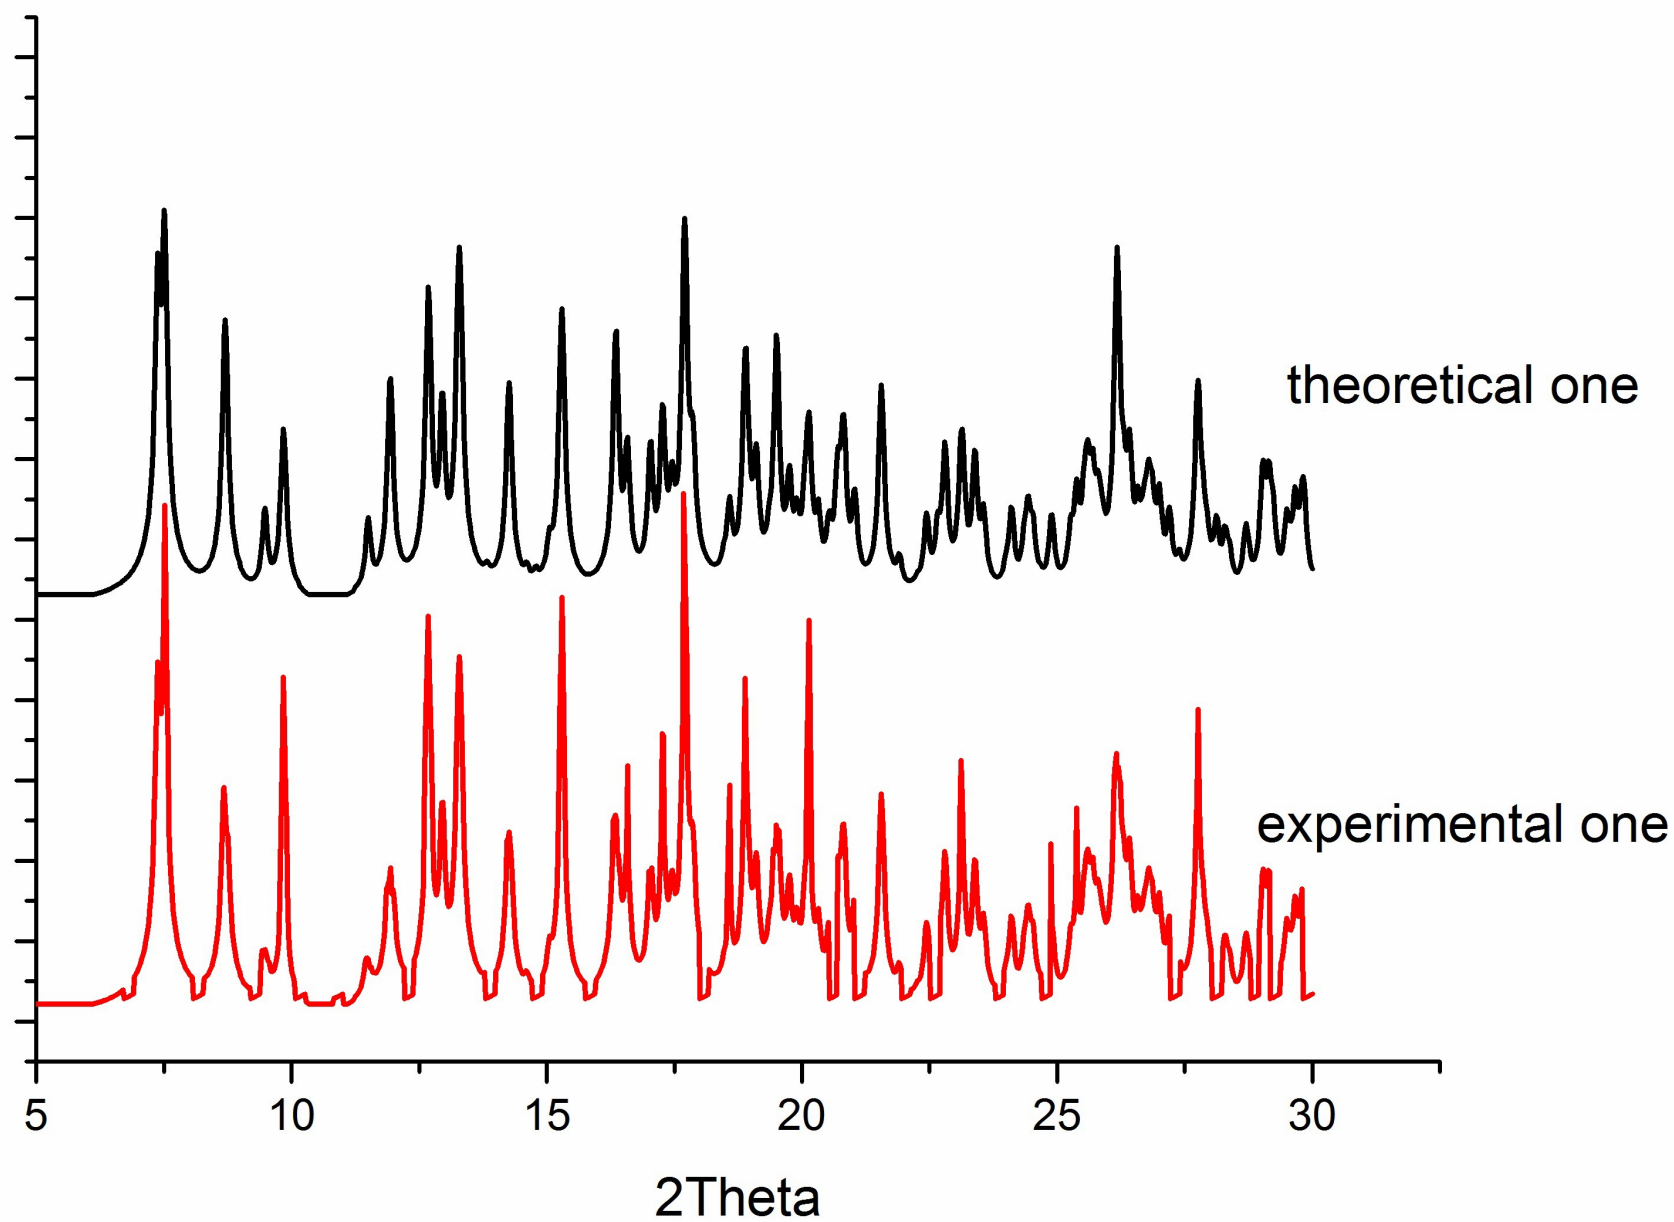

Supplement: c5ra03296b1.pdf [file c5ra03296b1.pdf]
